# Supplementary material for: Modeling Olfactory Bulb Evolution through Primate Phylogeny
Source: PubMed Central journal article supplement (PMC4245229; doi:10.1371/journal.pone.0113904), 2014-11-26

## File S1 (Supporting Information)

### **Contents**

|           |                                                                                 |
|-----------|---------------------------------------------------------------------------------|
| Table S1  | Olfactory bulb (OB) and total brain (TB) volumes.                               |
| Figure S1 | Crown-Primates subtree construction.                                            |
| Figure S2 | Eulipotyphla subtree construction.                                              |
| Figure S3 | Afroinsectivora subtree construction.                                           |
| Figure S4 | Scandentia subtree construction.                                                |
| Figure S5 | Final tree assembly.                                                            |
| Table S2  | Maximum likelihood values of different models and likelihood ratio comparisons. |
| Table S3  | Phylogenetic generalized least-squares model values and comparisons.            |
| Table S4  | Reconstructed ancestral nodes.                                                  |
| Figure S6 | Ancestral reconstruction using an alternate tree.                               |

**Table S1.** Olfactory bulb (OB) and total brain (TB) volumes.

| Species                             | Taxonomy        |                 |                    | OB (mm <sup>3</sup> ) | TB (mm <sup>3</sup> ) | log <sub>10</sub> OB | log <sub>10</sub> TB |
|-------------------------------------|-----------------|-----------------|--------------------|-----------------------|-----------------------|----------------------|----------------------|
| <i>Galago demidoff</i>              | Primates        | Strepsirrhini   | Lorisoidea         | 83.1                  | 3203                  | 1.919601             | 3.505557             |
| <i>Galago senegalensis</i>          | Primates        | Strepsirrhini   | Lorisoidea         | 79.2                  | 4512                  | 1.898725             | 3.654369             |
| <i>Otolemur crassicaudatus</i>      | Primates        | Strepsirrhini   | Lorisoidea         | 166.0                 | 9668                  | 2.220108             | 3.985337             |
| <i>Loris tardigradus</i>            | Primates        | Strepsirrhini   | Lorisoidea         | 85.8                  | 6269                  | 1.933487             | 3.797198             |
| <i>Nycticebus coucang</i>           | Primates        | Strepsirrhini   | Lorisoidea         | 159.0                 | 11755                 | 2.201397             | 4.070223             |
| <i>Perodicticus potto</i>           | Primates        | Strepsirrhini   | Lorisoidea         | 310.0                 | 13212                 | 2.491362             | 4.120969             |
| <i>Daubentonia madagascariensis</i> | Primates        | Strepsirrhini   | Lemuroidea         | 685.0                 | 42611                 | 2.835691             | 4.629522             |
| <i>Varecia variegata</i>            | Primates        | Strepsirrhini   | Lemuroidea         | 369.0                 | 29713                 | 2.567026             | 4.472947             |
| <i>Eulemur fulvus</i>               | Primates        | Strepsirrhini   | Lemuroidea         | 207.0                 | 22106                 | 2.315970             | 4.344510             |
| <i>Lepilemur ruficaudatus</i>       | Primates        | Strepsirrhini   | Lemuroidea         | 113.0                 | 7175                  | 2.053078             | 3.855822             |
| <i>Microcebus murinus</i>           | Primates        | Strepsirrhini   | Lemuroidea         | 43.0                  | 1680                  | 1.633468             | 3.225309             |
| <i>Cheirogaleus major</i>           | Primates        | Strepsirrhini   | Lemuroidea         | 158.0                 | 6373                  | 2.198657             | 3.804344             |
| <i>Cheirogaleus medius</i>          | Primates        | Strepsirrhini   | Lemuroidea         | 102.0                 | 2961                  | 2.008600             | 3.471438             |
| <i>Indri indri</i>                  | Primates        | Strepsirrhini   | Lemuroidea         | 168.0                 | 36285                 | 2.225309             | 4.559727             |
| <i>Avahi laniger</i>                | Primates        | Strepsirrhini   | Lemuroidea         | 89.2                  | 9798                  | 1.950365             | 3.991137             |
| <i>Avahi occidentalis</i>           | Primates        | Strepsirrhini   | Lemuroidea         | 70.1                  | 9124                  | 1.845718             | 3.960185             |
| <i>Propithecus verreauxi</i>        | Primates        | Strepsirrhini   | Lemuroidea         | 147.0                 | 25194                 | 2.167317             | 4.401297             |
| <i>Adaparis parisiensis</i> *       | Primates        | Strepsirrhini   | stem-Strepsirrhini | 266.6                 | 8310                  | 2.425860             | 3.919601             |
| <i>Notharctus tenebrosus</i> *      | Primates        | Strepsirrhini   | stem-Strepsirrhini | 236.6                 | 10430                 | 2.374015             | 4.018284             |
| <i>Tarsius sp.</i>                  | Primates        | Haplorhini      | Tarsiiformes       | 18.8                  | 3393                  | 1.274158             | 3.530584             |
| <i>Necrolemur antiquus</i> *        | Primates        | Haplorhini      | stem-Tarsiiformes  | 51.3                  | 2650                  | 1.710117             | 3.423246             |
| <i>Tetonius homunculus</i> *        | Primates        | Haplorhini      | stem-Tarsiiformes  | 32.8                  | 1500                  | 1.515874             | 3.176091             |
| <i>Parapithecus grangeri</i> *      | Primates        | Haplorhini      | stem-Anthropoidea  | 75.0                  | 11400                 | 1.875061             | 4.056905             |
| <i>Pithecia monachus</i>            | Primates        | Haplorhini      | Platyrrhini        | 34.8                  | 32867                 | 1.541579             | 4.516760             |
| <i>Callicebus moloch</i>            | Primates        | Haplorhini      | Platyrrhini        | 19.2                  | 17944                 | 1.283301             | 4.253919             |
| <i>Alouatta sp.</i>                 | Primates        | Haplorhini      | Platyrrhini        | 41.4                  | 49009                 | 1.617000             | 4.690276             |
| <i>Lagothrix lagotricha</i>         | Primates        | Haplorhini      | Platyrrhini        | 73.4                  | 95503                 | 1.865696             | 4.980017             |
| <i>Ateles geoffroyi</i>             | Primates        | Haplorhini      | Platyrrhini        | 90.4                  | 101034                | 1.956168             | 5.004468             |
| <i>Saimiri sciureus</i>             | Primates        | Haplorhini      | Platyrrhini        | 26.8                  | 22572                 | 1.428135             | 4.353570             |
| <i>Cebus sp.</i>                    | Primates        | Haplorhini      | Platyrrhini        | 39.9                  | 66939                 | 1.600973             | 4.825679             |
| <i>Saguinus oedipus</i>             | Primates        | Haplorhini      | Platyrrhini        | 19.1                  | 9537                  | 1.281033             | 3.979412             |
| <i>Saguinus midas</i>               | Primates        | Haplorhini      | Platyrrhini        | 17.3                  | 9569                  | 1.238046             | 3.980867             |
| <i>Callimico goeldii</i>            | Primates        | Haplorhini      | Platyrrhini        | 27.0                  | 10510                 | 1.431364             | 4.021603             |
| <i>Callithrix jacchus</i>           | Primates        | Haplorhini      | Platyrrhini        | 22.8                  | 7241                  | 1.357935             | 3.859799             |
| <i>Callithrix pygmaea</i>           | Primates        | Haplorhini      | Platyrrhini        | 12.3                  | 4302                  | 1.089905             | 3.633670             |
| <i>Aotus trivirgatus</i>            | Primates        | Haplorhini      | Platyrrhini        | 56.0                  | 16195                 | 1.748188             | 4.209381             |
| <i>Aegyptopithecus zeuxis</i> *     | Primates        | Haplorhini      | stem-Catarrhini    | 102.0                 | 14600                 | 2.008600             | 4.164353             |
| <i>Pan troglodytes</i>              | Primates        | Haplorhini      | Catarrhini         | 257.0                 | 382103                | 2.409933             | 5.582180             |
| <i>Homo sapiens</i>                 | Primates        | Haplorhini      | Catarrhini         | 114.0                 | 1251847               | 2.056905             | 6.097551             |
| <i>Gorilla gorilla</i>              | Primates        | Haplorhini      | Catarrhini         | 316.0                 | 470359                | 2.499687             | 5.672429             |
| <i>Hylobates lar</i>                | Primates        | Haplorhini      | Catarrhini         | 43.9                  | 97505                 | 1.642465             | 4.989027             |
| <i>Macaca mulatta</i>               | Primates        | Haplorhini      | Catarrhini         | 84.3                  | 87896                 | 1.925828             | 4.943969             |
| <i>Papio anubis</i>                 | Primates        | Haplorhini      | Catarrhini         | 287.0                 | 190957                | 2.457882             | 5.280936             |
| <i>Lophocebus albigena</i>          | Primates        | Haplorhini      | Catarrhini         | 121.0                 | 97603                 | 2.082785             | 4.989463             |
| <i>Erythrocebus patas</i>           | Primates        | Haplorhini      | Catarrhini         | 121.0                 | 97603                 | 1.714330             | 4.989463             |
| <i>Cercopithecus mitis</i>          | Primates        | Haplorhini      | Catarrhini         | 51.8                  | 103167                | 2.068186             | 5.013541             |
| <i>Cercopithecus ascanius</i>       | Primates        | Haplorhini      | Catarrhini         | 117.0                 | 70564                 | 1.997823             | 4.848583             |
| <i>Miopithecus talapoin</i>         | Primates        | Haplorhini      | Catarrhini         | 99.5                  | 63505                 | 1.444045             | 4.802808             |
| <i>Nasalis larvatus</i>             | Primates        | Haplorhini      | Catarrhini         | 27.8                  | 37776                 | 1.481443             | 4.577216             |
| <i>Pygathrix nemaeus</i>            | Primates        | Haplorhini      | Catarrhini         | 30.3                  | 92797                 | 1.481443             | 4.967534             |
| <i>Ptilinopus badius</i>            | Primates        | Haplorhini      | Catarrhini         | 10.7                  | 72530                 | 1.029384             | 4.860518             |
| <i>Ignacius graybullianus</i> *     | Primates        | Paraomomyoidea  |                    | 51.3                  | 73818                 | 2.073021             | 4.868162             |
| <i>Microsops annectens</i> *        | Primates        | Microsopidae    |                    | 118.31                | 2141.288              | 2.477923             | 3.330675             |
| <i>Cynocephalus sp.</i>             | Dermoptera      | Cynocephalidae  |                    | 300.554               | 5897.76               | 2.115611             | 3.770687             |
| <i>Tupaia glis</i>                  | Scandentia      | Tupaiaidae      |                    | 130.5                 | 5781.1                | 2.118926             | 3.762010             |
| <i>Urogale everetti</i>             | Scandentia      | Tupaiaidae      |                    | 131.5                 | 2999                  | 2.164818             | 3.476976             |
| <i>Tupaia minor</i>                 | Scandentia      | Tupaiaidae      |                    | 184.0                 | 3997                  | 1.974512             | 3.601734             |
| <i>Crocodyrus russula</i>           | Eulipotyphla    | Soricidae       | Crocodyrurinae     | 94.3                  | 2430                  | 1.212188             | 3.385606             |
| <i>Crocodyrus olivieri</i>          | Eulipotyphla    | Soricidae       | Crocodyrurinae     | 16.3                  | 178                   | 1.575188             | 2.250420             |
| <i>Suncus murinus</i>               | Eulipotyphla    | Soricidae       | Crocodyrurinae     | 37.6                  | 408                   | 1.534026             | 2.610660             |
| <i>Neomys fodiens</i>               | Eulipotyphla    | Soricidae       | Soricinae          | 34.2                  | 354                   | 1.198657             | 2.549003             |
| <i>Sorex araneus</i>                | Eulipotyphla    | Soricidae       | Soricinae          | 15.8                  | 299                   | 1.195900             | 2.475671             |
| <i>Sorex minutus</i>                | Eulipotyphla    | Soricidae       | Soricinae          | 15.7                  | 188                   | 0.937016             | 2.274158             |
| <i>Hemiechinus auritus</i>          | Eulipotyphla    | Erinaceidae     |                    | 8.7                   | 103                   | 2.243038             | 2.012837             |
| <i>Erinaceus europaeus</i>          | Eulipotyphla    | Erinaceidae     |                    | 175.0                 | 1710                  | 2.521138             | 3.232996             |
| <i>Aterix algirus</i>               | Eulipotyphla    | Erinaceidae     |                    | 332.0                 | 3050                  | 2.454845             | 3.484300             |
| <i>Talpa europaea</i>               | Eulipotyphla    | Talpidae        |                    | 285.0                 | 2859                  | 1.775246             | 3.456214             |
| <i>Galemys pyrenaicus</i>           | Eulipotyphla    | Talpidae        |                    | 59.6                  | 953                   | 2.149219             | 2.979093             |
| <i>Desmana moschata</i>             | Eulipotyphla    | Talpidae        |                    | 39.0                  | 1230                  | 1.767156             | 3.089905             |
| <i>Solenodon paradoxus</i>          | Eulipotyphla    | Solenodontidae  |                    | 141.0                 | 3620                  | 2.667453             | 3.558709             |
| <i>Echinops telfairi</i>            | Afroinsectivora | Tenrecidae      | Tenrecinae         | 465.0                 | 4282                  | 1.852480             | 3.631647             |
| <i>Setifer setosus</i>              | Afroinsectivora | Tenrecidae      | Tenrecinae         | 71.2                  | 566                   | 2.320146             | 2.752816             |
| <i>Tenrec ecaudatus</i>             | Afroinsectivora | Tenrecidae      | Tenrecinae         | 209.0                 | 1404                  | 2.496930             | 3.147367             |
| <i>Hemicentetes semispinosus</i>    | Afroinsectivora | Tenrecidae      | Tenrecinae         | 314.0                 | 2315                  | 1.971276             | 3.364551             |
| <i>Oryzomys hova</i>                | Afroinsectivora | Tenrecidae      | Oryzoricinae       | 93.6                  | 757                   | 1.671173             | 2.879096             |
| <i>Limnogale mergulus</i>           | Afroinsectivora | Tenrecidae      | Oryzoricinae       | 46.9                  | 538                   | 1.632457             | 2.730782             |
| <i>Microgale talpae</i>             | Afroinsectivora | Tenrecidae      | Oryzoricinae       | 42.9                  | 1046                  | 1.870989             | 3.019532             |
| <i>Microgale lamottei</i>           | Afroinsectivora | Tenrecidae      | Potamogalinae      | 74.3                  | 741                   | 1.531479             | 2.869818             |
| <i>Potamogale velox</i>             | Afroinsectivora | Tenrecidae      | Potamogalinae      | 34.0                  | 743                   | 1.934498             | 2.870989             |
| <i>Chrysochloris asiatica</i>       | Afroinsectivora | Chrysochloridae |                    | 86.0                  | 3878                  | 1.767156             | 3.588608             |
| <i>Chrysochloris stuhlmanni</i>     | Afroinsectivora | Chrysochloridae |                    | 58.5                  | 657                   | 1.782473             | 2.817565             |
| <i>Elephantulus fuscipes</i>        | Afroinsectivora | Macroscelididae |                    | 60.6                  | 693                   | 1.801404             | 2.840733             |
| <i>Rhynchocyon cirnei</i>           | Afroinsectivora | Macroscelididae |                    | 63.3                  | 1233                  | 2.629410             | 3.090963             |
|                                     |                 |                 |                    | 426.0                 | 5680                  |                      | 3.754348             |

Data for extant taxa from Stephan et al. (1981) and Pirlot and Kamiya (1982). Data for fossil taxa (==\*) from Bush et al. (1984), Gurche (1992), Silcox et al. (2009), Silcox et al. (2010) and Simons et al. (2007).

**Figure S1.** Crown-Primates subtree construction.

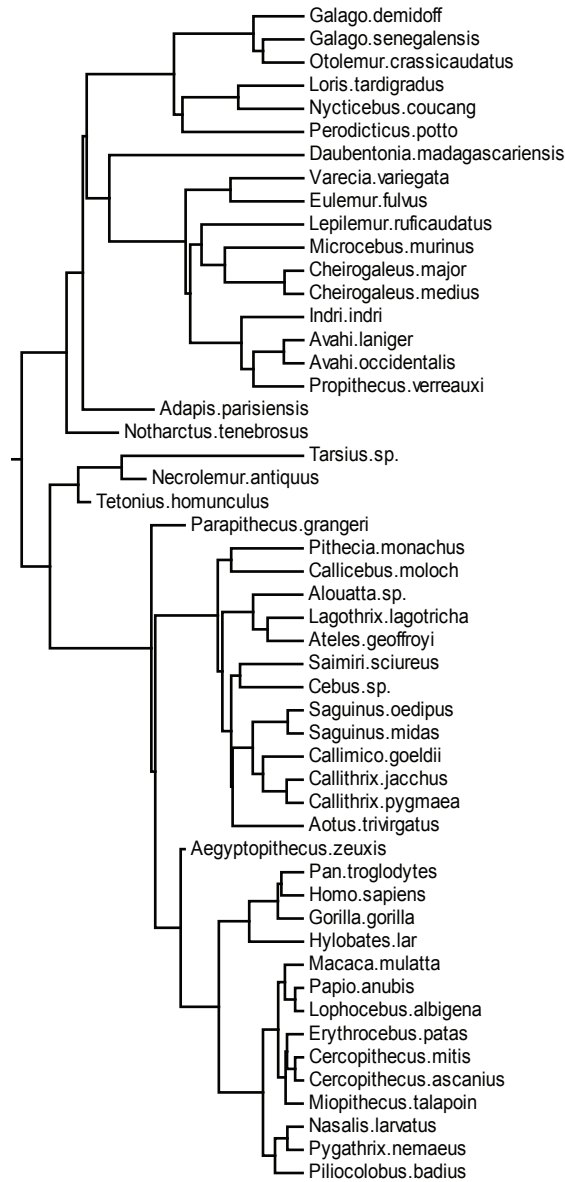

1. Chronogram (=ultrametric, time scaled) for extant primates followed Springer et al. (2012) [soft bounded, independent rates]. Taxa in the ordinal chronogram but not in the OB and TB dataset were pruned from the tree.

2. Six fossil crown-primates were grafted to the pruned chronogram of extant taxa. For fossil crown-primates (a) topological placements, (b) diversification dates, and (c) terminal dates followed Boyer and Seiffert (2013). Scale: 1.00 = 100 million years.

**FOSSIL CROWN-PRIMATES:**

1. *Adapis parisiensis*  
Topological placement: sister to (crown-Strepsirrhini)  
Diversification date: 0.559102  
Terminal date: 0.38
2. *Notharctus tenebrosus*  
Topological placement: sister to (*Adapis parisiensis*+crown-Strepsirrhini)  
Diversification date: 0.6  
Terminal date: 0.47
3. *Necrolemur antiquus*  
Topological placement: sister to (*Tarsius*)  
Diversification date: 0.46  
Terminal date: 0.4
4. *Tetonius homunculus*  
Topological placement: sister to (*Necrolemur antiquus*+*Tarsius*)  
Diversification date: 0.57  
Terminal date: 0.54
5. *Parapithecus grangeri*  
Topological placement: sister to (crown-Anthrogoidea)  
Diversification date: 0.384136  
Terminal date: 0.3
6. *Aegyptopithecus zeuxis*  
Topological placement: sister to (crown-Catarrhini)  
Diversification date: 0.31  
Terminal date: 0.3

**Newick format:**

```
(((((Galago.demidoff:0.125971,(Galago.senegalensis:0.101979,Otolemur.crassicaudatus:0.10197999999999999):0.023992):0.20165699999999999999,((Loris.tardigradus:0.163744,Nycticebus.couang:0.163745):0.141996,Perodicticus.potto:0.30574):0.021888):0.221472,(Daubentonia.madagascariensis:0.491954,((Varecia.variegata:0.184421,Eulemur.fulvus:0.184421999999999997):0.113546,(Lepilemur.ruficaudatus:0.257638000000000003,(Microcebus.murinus:0.198746,(Cheirogaleus.major:0.04682,Cheirogaleus.medius:0.04682):0.151927):0.058891):0.028783,(Indri.indri:0.156182,((Avahi.laniger:0.048968,Avahi occidentalis:0.048968):0.076767,Propithecus.verreauxi:0.125736):0.030446):0.130239):0.011546):0.193988):0.057146):0.01,Adapis.parisiensis:0.179102):0.040898, Notharctus.tenebrosus:0.13):0.113547,(((Tarsius.sp.:0.459999,Necrolemur.antiquus:0.06):0.11,Tetonius.homunculus:0.03):0.071795,(Parapithecus.grangeri:0.084136,((Pithecia.monachus:0.181106000000000004,Callicebus.moloch:0.181107000000000002):0.034283,(Alouatta.sp.:0.125014000000000001,(Lagothrix.lagothrix:0.088702,Ateles.geoffroyi:0.088701):0.036312):0.07832,((Saimiri.sciureus:0.157967000000000002,Cebus.sp.:0.157967):0.022722,((Saguinus.oedipus:0.037793,Saguinus.midas:0.037793):0.088336,(Callimico.goeldii:0.100564,(Callithrix.jacchus:0.040230999999999996,Callithrix.pygmaea:0.04023):0.060333):0.025564):0.050936,Aotus.trivirgatus:0.177065):0.003625):0.022645):0.012055):0.158745,(Aegyptopithecus.zeuxis:0.01,(((Pan.troglodytes:0.054377999999999996,Homo.sapiens:0.054378):0.008648,Gorilla.gorilla:0.063026):0.072995,Hylobates.lar:0.136021):0.076778,((Macaca.mulatta:0.045135,(Papio.anubis:0.019322,Lophocebus.albigena:0.019323):0.025813000000000003):0.016952,((Erythrocebus.patas:0.039723,(Cercopithecus.mitis:0.019497,Cercopithecus.ascanius:0.019498):0.020225):0.003582, Miopithecus.talapoin:0.043306):0.018781):0.038587,((Nasalis.larvatus:0.038777,Pygathrix.nemaus:0.038777):0.031587000000000004, Ptilocolobus.badius:0.070363):0.03031):0.112126):0.097199):0.064136):0.01):0.257659):0.071752);
```

**Figure S2.** Eulipotyphla subtree construction.

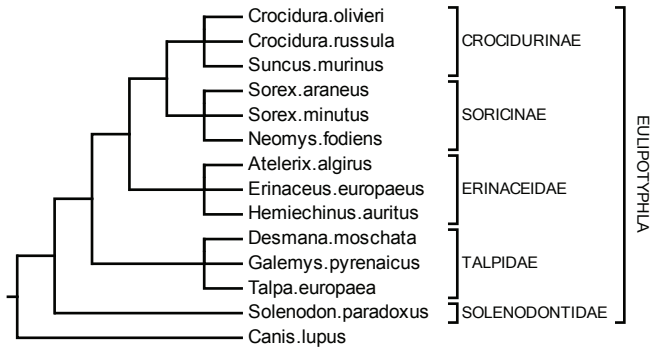

Newick format:

```
(((((Crociodura.olivieri,Crociodura.russula,Suncus.murinus),
(Sorex.araneus,Sorex.minutus,Neomys.fodiens)),(Atelerix.algirus,
Erinaceus.europaeus,Hemiechinus.auritus)),(Desmana.moschata,
Galemys.pyrenaicus,Talpa.europaea)),Solenodon.paradoxus),
Canis.lupus);
```

1. Constraint topology followed family (and subfamily) level DNA tree of Meredith et al. (2011). Taxa in the OB and TB volumetric dataset were binned in their respective taxonomic groups (assumes monophyly at these ranks).

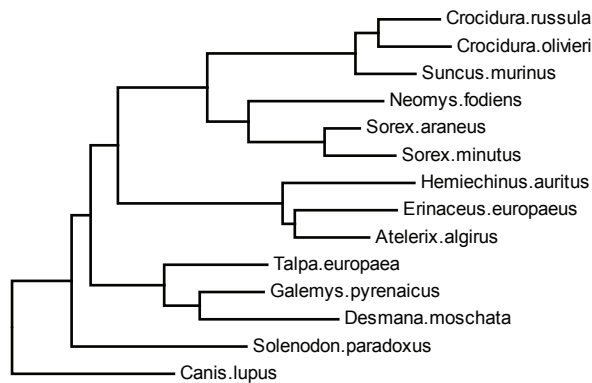

Newick format:

```
(((((Crociodura.russula:0.04314379,Crociodura.olivieri:0.05055668):
0.01605615,Suncus.murinus:0.04205046):0.10400920,(Neomys.fodiens:
0.09444923,(Sorex.araneus:0.02462759,Sorex.minutus:0.04974728):
0.05332713):0.02911712):0.06282364,(Hemiechinus.auritus:0.09244562,
(Erinaceus.europaeus:0.07150381,Atelerix.algirus:0.05207989):
0.00868019):0.11580983):0.01925693,(Talpa.europaea:0.07233052,
(Galemys.pyrenaicus:0.04483551,Desmana.moschata:0.09721575):
0.02491691):0.05165280):0.01347531,Solenodon.paradoxus:0.12265715):
0.04188398,Canis.lupus:0.11359074);
```

2. Phylogram (=genetic distance) produced by fitting a 13 gene (3 mitochondrial, 10 nuclear) concatenation to the constraint topology. Software: MEGA v5.10, Method: Maximum Likelihood, Model: GTR+G+I, Concatenation length: 11,777, Gene segments: 12S, COX1, CYTB, ADRAB2, APOB, BRCA1, CREM, EDG1, GHR, PLCB4, RAG1, RAG2, VWF.

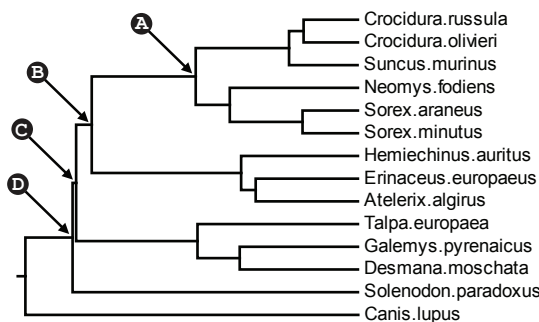

Newick format:

```
(((((Crociodura.russula:0.145928,Crociodura.olivieri:0.145928):
0.038772,Suncus.murinus:0.184701):0.251499,(Neomys.fodiens:
0.344678,(Sorex.araneus:0.148752,Sorex.minutus:0.148752):0.195926):
0.091522):0.280500,(Hemiechinus.auritus:0.314198,
(Erinaceus.europaeus:0.275062,Atelerix.algirus:0.275062):0.039136):
0.402502):0.042300,(Talpa.europaea:0.432249,(Galemys.pyrenaicus:
0.318349,Desmana.moschata:0.318349):0.113900):0.326751):0.009900,
Solenodon.paradoxus:0.768900):0.127337,Canis.lupus:0.896237);
```

3. Chronogram (=ultrametric, time-scaled) produced by linearizing the phylogram with 4 fixed diversification dates. Dates followed Meredith et al. (2011) [DNA analysis, soft bounded, independent rates]. Software: r8s, Method: Penalized Likelihood & Newton algorithm, Scale: 1.00 = 100 million years. Outgroup was subsequently pruned from the subtree.

FIXED DIVERSIFICATION DATES:

- A. 0.4362 Soricidae  
(=Soricinae to Crocidurinae)
- B. 0.7167 Erinaceidae to Soricidae
- C. 0.7590 Talpidae to Erinaceidae+Soricidae
- D. 0.7689 Eulipotyphla  
(=Solenodontidae to Talpidae+Erinaceidae+Soricidae)

**Figure S3.** Afroinsectivora subtree construction.

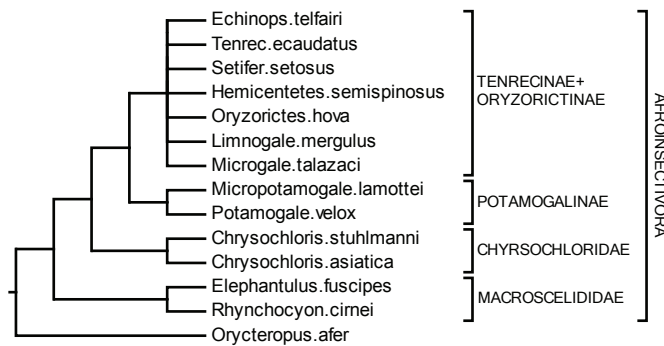

Newick format:

```
(((((Echinops.telfairi,Tenrec.ecaudatus,Setifer.setosus,
Hemicentetes.semispinosus,Oryzorictes.hova,Limnogale.mergulus,
Microgale.talazaci),(Micropotamogale.lamottei,Potamogale.velox)),
(Chrysochloris.stuhlmanni,Chrysochloris.asiatica)),
(Elephantulus.fuscipes,Rhynchocyon.cirnei)),Orycteropus.afer);
```

1. Constraint topology followed family (and subfamily) level DNA tree of Meredith et al. (2011). Taxa in the OB and TB volumetric dataset were binned in their respective taxonomic groups (assumes monophyly at these ranks).

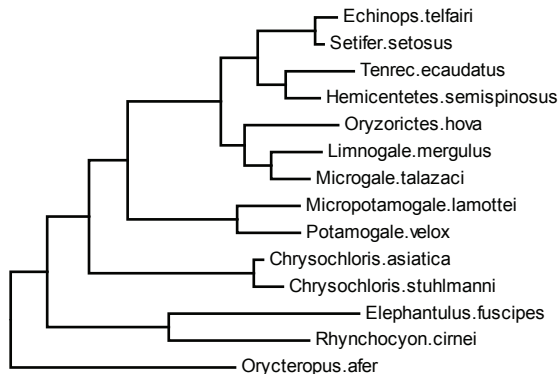

Newick format:

```
(((((Echinops.telfairi:0.01385078,Setifer.setosus:0.00557274):
0.03696563,(Tenrec.ecaudatus:0.04394974,Hemicentetes.semispinosus:
0.02198982):0.01798645):0.02385688,(Oryzorictes.hova:0.06042377,
(Limnogale.mergulus:0.03240558,Microgale.talazaci:0.02477554):
0.01717926):0.01535886):0.06020077,(Micropotamogale.lamottei:
0.04015078,Potamogale.velox:0.04042073):0.07060328):0.02485262,
(Chrysochloris.asiatica:0.00590999,Chrysochloris.stuhlmanni:
0.01883818):0.10624880):0.02701635,(Elephantulus.fuscipes:
0.12268446,Rhynchocyon.cirnei:0.09045019):0.07836542):0.05274231,
Orycteropus.afer:0.11569610);
```

2. Phylogram (=genetic distance) produced by fitting an 11 gene (2 mitochondrial, 9 nuclear) concatenation to the constraint topology. Software: MEGA v5.10, Method: Maximum Likelihood, Model: GTR+G+I, Concatenation length: 11,708, Gene segments: 12S, ND2, ADRAB2, BDNF, BMI1, BRCA1, CREM, GHR, PLCB4, RAG1, VWF.

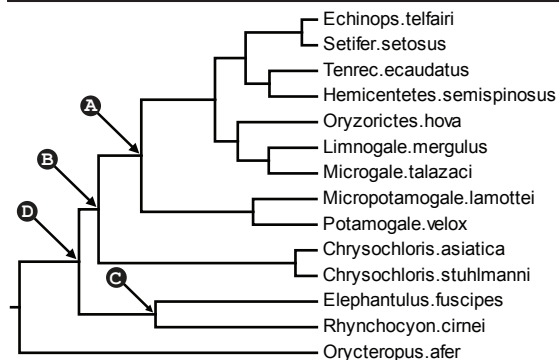

Newick format:

```
(((((Echinops.telfairi:0.048571,Setifer.setosus:0.048571):
0.182338,(Tenrec.ecaudatus:0.153568,Hemicentetes.semispinosus:
0.153568):0.077341):0.099501,(Oryzorictes.hova:0.256820,
(Limnogale.mergulus:0.155915,Microgale.talazaci:0.155915):
0.100905):0.073589):0.238891,(Micropotamogale.lamottei:0.206090,
Potamogale.velox:0.206090):0.363210):0.138200,
(Chrysochloris.asiatica:0.068318,Chrysochloris.stuhlmanni:
0.068318):0.639182):0.063800,(Elephantulus.fuscipes:0.523200,
Rhynchocyon.cirnei:0.523200):0.248100):0.193597,
Orycteropus.afer:0.964897);
```

3. Chronogram (=ultrametric, time-scaled) produced by linearizing the phylogram with 4 fixed diversification dates. Dates followed Meredith et al. (2011) [DNA analysis, soft bounded, independent rates]. Software: r8s, Method: Penalized Likelihood & Newton algorithm, Scale: 1.00 = 100 million years. Outgroup was subsequently pruned from the subtree.

FIXED DIVERSIFICATION DATES:

- A. 0.5693 Tenrecidae  
(=Potamogalinae to Tenrecinae+Oryzorictinae)
- B. 0.7075 Afrosericida  
(=Chrysochloridae to Tenrecidae)
- C. 0.5232 Macroscelididae  
(=Rhynchocyon to Elephantulus)
- D. 0.7713 Afroinsectivora  
(=Macroscelididae to Afrosericida)

**Figure S4.** Scandentia subtree construction.

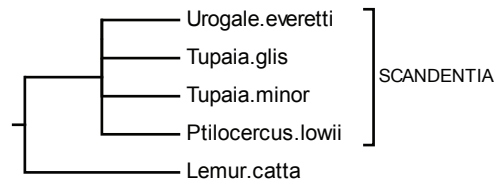

Newick format:

```
((Urogale.everetti,Tupaia.glis,Tupaia.minor,Ptilocercus.lowii),Lemur.catta);
```

1. Constraint topology for the scandentian order (assumes monophyly at this rank). *U. everetti*, *T. glis* and *T. minor* are part of the OB and TB volumetric dataset. *P. lowii* is not part of the volumetric dataset but was included to provide an additional diversification date for the order.

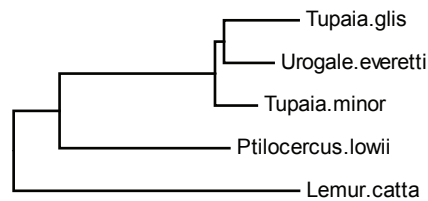

Newick format:

```
((((Tupaia.glis:0.03419161,Urogale.everetti:0.02278467):0.00409895,Tupaia.minor:0.01909480):0.07120454,Ptilocercus.lowii:0.07777949):0.02107726,Lemur.catta:0.13057236);
```

2. Phylogram (=genetic distance) produced by fitting a 14 gene (2 mitochondrial, 12 nuclear) concatenation to the constraint topology. Software: MEGA v5.10, Method: Maximum Likelihood, Model: GTR+G+I, Concatenation length: 9,850, Gene segments: 12S, 16S, ADORA3, ADRAB2, APP, ATP7A, BDNF, CREM, EDG1, PLCB4, PNOC, RAG2, TYR, VWF.

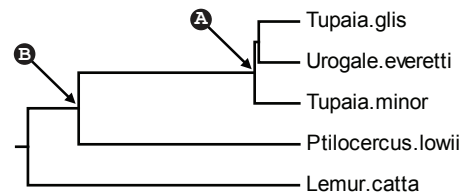

Newick format:

```
((((Tupaia.glis:0.102761,Urogale.everetti:0.102761):0.010739,Tupaia.minor:0.113500):0.449000,Ptilocercus.lowii:0.562500):0.129229,Lemur.catta:0.691729);
```

3. Chronogram (=ultrametric, time-scaled) produced by linearizing the phylogram with 2 fixed diversification dates. Date for *T. glis* to *T. minor* followed Springer et al. (2012) [soft bounded, independent rates]. Date for *Tupaia* to *P. lowii* followed Meredith et al. (2011) [DNA analysis, soft bounded, independent rates]. Software: r8s, Method: Penalized Likelihood & Newton algorithm, Scale: 1.00 = 100 million years. Outgroup and *P. lowii* were subsequently pruned from the subtree.

FIXED DIVERSIFICATION DATES:

- A. 0.1135 *Tupaia glis* to *Tupaia minor*
- B. 0.5625 *Tupaia* to *Ptilocercus lowii*



**Figure S5.** Final tree assembly.

The phylogeny used in this study (Fig. 2) was constructed by joining *Cynocephalus* (Dermoptera) and the four subtrees [crown-Primates (Fig. S1), Eulipotyphla (Fig. S2), Afroinsectivora (Fig. S3), Scandentia (Fig. S4)]. Topological relationships and diversification dates followed Meredith et al. (2011) [DNA analysis, soft bounded, independent rates]. Stem-Primates were then grafted to the tree following the topology of Bloch et al. (2007) and with branches terminating at specimen ages. Diversification for each stem-Primate branch was estimated at 1 Ma older than the base node of its sister-clade. Scale: 1.00 = 100 million years.

Topology:

(((crown-Primates,Dermoptera),Scandentia),Eulipotyphla),Afroinsectivora);

Diversification dates:

- A. 0.8337 crown-Primates to Dermoptera
- B. 0.8389 crown-Primates+Dermoptera to Scandentia
- C. 0.9167 crown-Primates+Dermoptera+Scandentia to Eulipotyphla
- D. 1.0099 crown-Primates+Dermoptera+Scandentia+Eulipotyphla to Afroinsectivora

STEM-PRIMATES

1. *Ignacius graybullianus*

Topological placement: sister to (crown-Primates)

Diversification date: 0.723547

Terminal date: 0.55

2. *Microsypops annectens*

Topological placement: sister to (crown-Primates+*Ignacius*)

Diversification date: 0.733547

Terminal date: 0.48

Final tree used in this study (Newick format):

```
((((( ((( ((( (Galago.demidoff:0.125971, (Galago.senegalensis:0.101979, Otolemur.crassicaudatus:0.101979999999999999):0.023992):0.201656999999999998, (Loris.tardigradus:0.163744, Nycticebus.coucang:0.163745):0.141996, Perodicticus.potto:0.30574):0.021888):0.221472, (Daubentonia.madagascariensis:0.491954, (Varecia.variegata:0.184421, Eulemur.fulvus:0.184421999999999997):0.113546, (Lepilemur.ruficaudatus:0.257638000000000003, (Microcebus.murinus:0.198746, (Cheirogaleus.major:0.04682, Cheirogaleus.medius:0.04682):0.151927):0.058891):0.028783, (Indri.indri:0.156182, (Avahi.laniger:0.048968, Avahi occidentalis:0.048968):0.076767, Propithecus.verreauxi:0.125736):0.030446):0.130239):0.011546):0.193988):0.057146):0.01, Adapis.parisiensis:0.179102):0.040898, Notharctus.tenebrosus:0.13):0.113547, (((Tarsius.sp.:0.459999, Necrolemur.antiquus:0.06):0.11, Tetonius.homunculus:0.03):0.071795, (Parapithecus.grangeri:0.084136, ((Pithecia.monachus:0.181106000000000004, Callicebus.moloch:0.181107000000000002):0.034283, (Alouatta.sp.:0.125014000000000001, (Lagothrix.lagothrix:0.088702, Ateles.geoffroyi:0.088701):0.036312):0.07832, ((Saimiri.sciureus:0.157967000000000002, Cebus.sp.:0.157967):0.022722, ((Saguinus.oedipus:0.037793, Saguinus.midas:0.037793):0.088336, (Callimico.goeldii:0.100564, (Callithrix.jacchus:0.040230999999999996, Callithrix.pygmaea:0.04023):0.060333):0.025564):0.050936, Aotus.trivirgatus:0.177065):0.003625):0.022645):0.012055):0.158745, (Aegyptopithecus.zeuxis:0.01, (((Pan.troglodytes:0.054377999999999996, Homo.sapiens:0.054378):0.008648, Gorilla.gorilla:0.063026):0.072995, Hylobates.lar:0.136021):0.076778, ((Macaca.mulatta:0.045135, (Papio.anubis:0.019322, Lophocebus.albigena:0.019323):0.025813000000000003):0.016952, ((Erythrocebus.patas:0.039723, (Cercopithecus.mitis:0.019497, Cercopithecus.ascanius:0.019498):0.020225):0.003582, Miopithecus.talapoin:0.043306):0.018781):0.038587, ((Nasalis.larvatus:0.038777, Pygathrix.nemaues:0.038777):0.031587000000000004, Ptilocolobus.badius:0.070363):0.03031):0.112126):0.097199):0.064136):0.01):0.257659):0.071752):0.01, Ignacius.graybullianus:0.173546):0.01, Microsypops.annectens:0.253546):0.100155, Cynocephalus.sp.:0.8337):0.0052, ((Tupaia.glis:0.102761, Urogale.everetti:0.102761):0.010739, Tupaia.minor:0.1135):0.7254):0.0778, (((((Crocidura.russula:0.145928, Crocidura.olivieri:0.145928):0.038772, Suncus.murinus:0.184701):0.251499, (Neomys.fodiens:0.344678, (Sorex.araneus:0.148752, Sorex.minutus:0.148752):0.195926):0.091522):0.2805, (Hemiechinus.auritus:0.314198, (Erinaceus.europaes:0.275062, Atelerix.algirus:0.275062):0.039136):0.402502):0.0423, (Talpa.europaes:0.432249, (Galemys.pyrenaicus:0.318349, Desmana.moschata:0.318349):0.1139):0.326751):0.0099, Solenodon.paradoxus:0.7689):0.1478):0.0932, (((((Echinops.telfairi:0.048571, Setifer.setosus:0.048571):0.182338, (Tenrec.ecaudatus:0.153568, Hemicentetes.semispinosus:0.153568):0.077341):0.099501, (Oryzorictes.hova:0.25682, (Limnogale.mergulus:0.155915, Microgale.talazaci:0.155915):0.100905):0.073589):0.238891, (Micropotamogale.lamottei:0.20609, Potamogale.velox:0.20609):0.36321):0.1382, (Chrysochloris.asiatica:0.068318, Chrysochloris.stuhlmanni:0.068318):0.639182):0.0638, (Elephantulus.fuscipes:0.5232, Rhynchocyon.cirnei:0.5232):0.2481):0.2386):0.1, OG:1.1099);
```

**Table S2.** Maximum likelihood values of different models and likelihood ratio comparisons.

| Olfactory Bulb                     |                  |                 | Total Brain                        |                  |                 |
|------------------------------------|------------------|-----------------|------------------------------------|------------------|-----------------|
| scaling parameters                 | Brownian Lh      | Directional Lh  | scaling parameters                 | Brownian Lh      | Directional Lh  |
| none                               | -36.500180       | -36.296069      | none                               | -39.771246       | -36.632103      |
| $\kappa$                           | -27.893537       | -26.165441      | $\kappa$                           | -33.903584       | -33.028625      |
| $\delta$                           | -33.799494       | -33.535831      | $\delta$                           | -39.114350       | -36.429743      |
| $\lambda$                          | -30.355702       | -30.030860      | $\lambda$                          | -39.489269       | -36.228701      |
| $\kappa\delta$                     | -27.424841       | -25.585347      | $\kappa\delta$                     | -33.706419       | -32.611714      |
| $\kappa\lambda$                    | -27.703511       | -25.801022      | $\kappa\lambda$                    | -33.903584       | -33.028625      |
| $\delta\lambda$                    | -30.192024       | -29.861930      | $\delta\lambda$                    | -39.070008       | -36.187005      |
| $\kappa\delta\lambda$              | -27.353794       | -25.460322      | $\kappa\delta\lambda$              | -33.706419       | -32.611714      |
| Brownian versions                  | LR               | <i>P</i>        | Brownian versions                  | LR               | <i>P</i>        |
| $\kappa$ vs. none                  | <b>17.213286</b> | <b>0.000033</b> | $\kappa$ vs. none                  | <b>11.735324</b> | <b>0.000613</b> |
| $\kappa\delta$ vs. $\kappa$        | 0.937392         | 0.332949        | $\kappa\delta$ vs. $\kappa$        | 0.394330         | 0.530032        |
| $\kappa\lambda$ vs. $\kappa$       | 0.380052         | 0.537575        | $\kappa\delta\lambda$ vs. $\kappa$ | 0.394330         | 0.821055        |
| $\kappa\delta\lambda$ vs. $\kappa$ | 1.079486         | 0.582898        |                                    |                  |                 |
| Directional versions               | LR               | <i>P</i>        | Directional versions               | LR               | <i>P</i>        |
| $\kappa$ vs. none                  | <b>20.261256</b> | <b>0.000007</b> | $\kappa$ vs. none                  | <b>7.206956</b>  | <b>0.007262</b> |
| $\kappa\delta$ vs. $\kappa$        | 1.160188         | 0.281427        | $\kappa\delta$ vs. $\kappa$        | 0.833822         | 0.361170        |
| $\kappa\lambda$ vs. $\kappa$       | 0.728838         | 0.393260        | $\kappa\delta\lambda$ vs. $\kappa$ | 0.833822         | 0.659080        |
| $\kappa\delta\lambda$ vs. $\kappa$ | 1.410238         | 0.494050        |                                    |                  |                 |
| InterModel                         | LR               | <i>P</i>        | InterModel                         | LR               | <i>P</i>        |
| Dir+ $\kappa$ vs. Bro+ $\kappa$    | 3.456192         | 0.063015        | Dir+ $\kappa$ vs. Bro+ $\kappa$    | 1.749918         | 0.185887        |

Lh = Maximum likelihood value

LR = Likelihood ratio value

Brownian, Bro = *BayesTraits* model A (constant variance random walk)Directional, Dir = *BayesTraits* model B

Bold indicates significant LR comparisons



**Table S3.** Phylogenetic generalized least-squares model values and comparisons.

| Parameter Est        | Model Lh           | $\alpha$ (intercept) | $\beta$ -2 (slope) | Var      | R <sup>2</sup> | s.e. $\alpha$ | s.e. $\beta$ -2 | Kappa ( $\kappa$ ) | Delta ( $\delta$ ) | Lambda ( $\lambda$ ) |
|----------------------|--------------------|----------------------|--------------------|----------|----------------|---------------|-----------------|--------------------|--------------------|----------------------|
| <b>Eulipotyphla</b>  |                    |                      |                    |          |                |               |                 |                    |                    |                      |
| none                 | 8.960480           | -1.141842            | 1.006294           | 0.034662 | 0.898954       | 0.322150      | 0.101723        | fixed=1            | fixed=1            | fixed=1              |
| * $\kappa$           | 10.977860          | -1.059842            | 0.966355           | 0.345374 | 0.940405       | 0.217673      | 0.073348        | ML=2.999986        | fixed=1            | fixed=1              |
| $\delta$             | 9.460576           | -1.085986            | 0.992567           | 0.042488 | 0.900461       | 0.331391      | 0.099501        | fixed=1            | ML=0.448837        | fixed=1              |
| $\lambda$            | 8.960448           | -1.141842            | 1.006294           | 0.034662 | 0.898954       | 0.322151      | 0.101723        | fixed=1            | fixed=1            | ML=0.999995          |
| <b>Strepsirrhini</b> |                    |                      |                    |          |                |               |                 |                    |                    |                      |
| *none                | 10.228534          | -0.381396            | 0.650417           | 0.070715 | 0.769464       | 0.388656      | 0.091922        | fixed=1            | fixed=1            | fixed=1              |
| $\kappa$             | 10.360920          | -0.315130            | 0.629770           | 0.136528 | 0.772559       | 0.371883      | 0.088228        | ML=1.337308        | fixed=1            | fixed=1              |
| $\delta$             | 10.283485          | -0.393929            | 0.652043           | 0.073142 | 0.766372       | 0.388664      | 0.092955        | fixed=1            | ML=1.323408        | fixed=1              |
| $\lambda$            | 10.228498          | -0.381396            | 0.650417           | 0.070714 | 0.769463       | 0.388657      | 0.091923        | fixed=1            | fixed=1            | ML=0.999995          |
| <b>Haplorhini</b>    |                    |                      |                    |          |                |               |                 |                    |                    |                      |
| none                 | -7.273026          | -0.961285            | 0.578220           | 0.727084 | 0.282785       | 0.883255      | 0.180594        | fixed=1            | fixed=1            | fixed=1              |
| $\kappa$             | -2.298742          | -0.454659            | 0.470195           | 0.030386 | 0.310912       | 0.561624      | 0.137281        | ML=0.000000        | fixed=1            | fixed=1              |
| $\delta$             | -4.666080          | -0.821458            | 0.537017           | 0.665299 | 0.311995       | 0.729630      | 0.156395        | fixed=1            | ML=2.999998        | fixed=1              |
| * $\lambda$          | -0.933177          | -0.703902            | 0.509720           | 0.104737 | 0.597795       | 0.387711      | 0.081996        | fixed=1            | fixed=1            | ML=0.000000          |
| Comparison           |                    | LR                   | <i>P</i>           |          |                |               |                 |                    |                    |                      |
| Eulipotyphla         | $\kappa$ vs. none  | <b>4.034760</b>      | <b>0.044572</b>    |          |                |               |                 |                    |                    |                      |
| Strepsirrhini        | $\kappa$ vs. none  | 0.264772             | 0.606861           |          |                |               |                 |                    |                    |                      |
| Haplorhini           | $\lambda$ vs. none | <b>12.679698</b>     | <b>0.000370</b>    |          |                |               |                 |                    |                    |                      |

Values are from *BayesTraits* continuous PGLS regression.

Bold indicates significant likelihood ratio comparison.

Asterisk indicates model used for PGLS regression in Fig 1.

**Table S4.** Reconstructed ancestral nodes.

| Ancestral node               | Olfactory bulb |                  |                  | Total brain |                  |                  | Ratio  |
|------------------------------|----------------|------------------|------------------|-------------|------------------|------------------|--------|
|                              | Mean           | Lower<br>95% HPD | Upper<br>95% HPD | Mean        | Lower<br>95% HPD | Upper<br>95% HPD | OB/TB  |
| A Afroinsectivora            | 2.0394         | 1.6693           | 2.4047           | 3.2544      | 2.8487           | 3.6717           | 0.6267 |
| B Boreoeutheria              | 2.1309         | 1.7851           | 2.4756           | 3.4011      | 3.0033           | 3.7958           | 0.6265 |
| C Eulipotyphla               | 2.1820         | 1.8134           | 2.5138           | 3.3488      | 2.9510           | 3.7441           | 0.6516 |
| D Euarchonta                 | 2.1342         | 1.8084           | 2.4808           | 3.5139      | 3.1244           | 3.9042           | 0.6074 |
| E Scandentia                 | 2.0995         | 1.8086           | 2.3894           | 3.4787      | 3.1301           | 3.8283           | 0.6035 |
| F crown-Primates             | 2.1212         | 1.7988           | 2.4052           | 3.6884      | 3.3287           | 4.0579           | 0.5751 |
| G Haplorhini                 | 1.8642         | 1.5481           | 2.1892           | 3.6868      | 3.3021           | 4.0724           | 0.5056 |
| H pan-Anthropoidea           | 1.8557         | 1.5619           | 2.1388           | 4.0377      | 3.6798           | 4.3957           | 0.4596 |
| I Platyrrhini                | 1.6304         | 1.3341           | 1.9287           | 4.3682      | 4.0118           | 4.7338           | 0.3732 |
| J pan-Catarrhini             | 1.9283         | 1.6796           | 2.1721           | 4.3184      | 4.0012           | 4.6466           | 0.4465 |
| K Hominoidea                 | 1.9350         | 1.6400           | 2.2299           | 5.0842      | 4.7205           | 5.4432           | 0.3806 |
| L Cercopithecoidea           | 1.7522         | 1.4594           | 2.0476           | 4.8318      | 4.4610           | 5.1915           | 0.3626 |
| M pan-Strepsirrhini          | 2.2762         | 1.9771           | 2.5725           | 3.8930      | 3.5359           | 4.2496           | 0.5847 |
| N Lemuroidea                 | 2.4392         | 2.1011           | 2.7774           | 4.2295      | 3.8428           | 4.6222           | 0.5767 |
| O Lorisioidea                | 2.2345         | 1.9048           | 2.5711           | 3.9425      | 3.5583           | 4.3288           | 0.5668 |
| pan-Primates                 | 2.1241         | 1.9026           | 2.5060           | 3.6332      | 3.2759           | 3.9882           | 0.5846 |
| crown-Strepsirrhini          | 2.3506         | 2.0379           | 2.6725           | 4.0382      | 3.6653           | 4.4169           | 0.5821 |
| pan-Tarsiiformes             | 1.6479         | 1.3788           | 1.9221           | 3.4293      | 3.0906           | 3.7798           | 0.4805 |
| Cercopithecinae              | 1.8201         | 1.5524           | 2.0853           | 4.8650      | 4.5169           | 5.1992           | 0.3741 |
| Colobinae                    | 1.6059         | 1.3390           | 1.8720           | 4.8654      | 4.5346           | 5.1989           | 0.3301 |
| Placentalia                  | 2.0936         | 1.7767           | 2.4078           | 3.3390      | 2.9764           | 3.7029           | 0.6270 |
| Root (alpha)                 | 2.0935         | 1.7836           | 2.4030           | 3.3388      | 3.0032           | 3.6740           | 0.6270 |
| $\kappa$ (scaling parameter) | 0.3565         | 0.1467           | 0.5715           | 0.2684      | 0.0106           | 0.5193           |        |

Values are  $\log_{10}$  transformed volumes ( $\text{mm}^3$ ).

HPD = highest posterior density.

*BayesTraits* settings are in methods.

Figure S6. Ancestral reconstruction using an alternate tree.

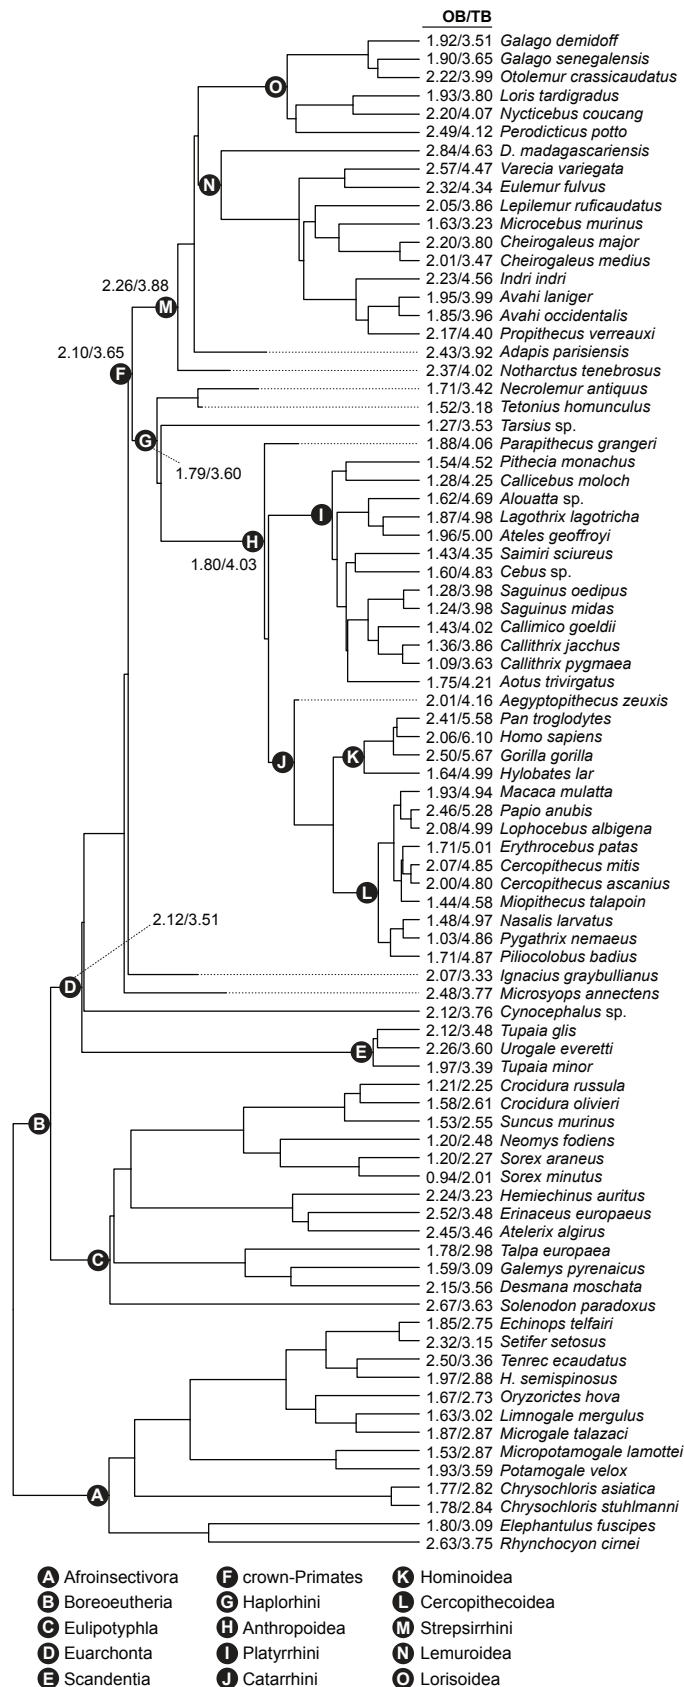

This alternate tree adapts the figure 2 tree by placing *Necrolemur* and *Tetonius* as stem-haplorhines. These two taxa were removed from the figure 2 tree and then re-grafted following the topology of Bajpai et al. (2008). For both taxa, branch termination dates were retained. Following Boyer and Seiffert (2013), ghost lineages were minimized by estimating diversification of (1) *Necrolemur*+*Tetonius* from crown-haplorhines at 1 Ma older than the crown-haplorhine node and (2) *Necrolemur* from *Tetonius* at 1 Ma older than the *Tetonius* terminal. Estimation of values at ancestral nodes using the alternate tree followed the same procedure described for the figure 2 tree (see methods).

#### Nodal reconstructions using different trees.

|                  | Figure 2 tree |      | Alternate tree |      |
|------------------|---------------|------|----------------|------|
|                  | OB            | TB   | OB             | TB   |
| D Euarchonta     | 2.13          | 3.51 | 2.12           | 3.51 |
| F crown-Primates | 2.12          | 3.69 | 2.10           | 3.65 |
| G Haplorhini     | 1.86          | 3.69 | 1.79           | 3.60 |
| H Anthropoidea   | 1.86          | 4.04 | 1.80           | 4.03 |
| M Strepsirrhini  | 2.28          | 3.89 | 2.26           | 3.88 |

#### Paths-plots of OB evolution.

(A) OB change relative to TB volume; (B) absolute OB change. Vertical axes depict clade nesting and are dimensionless. Solid-outline circles represent nodal reconstructions using the figure 2 tree. Dashed-outline circles represent nodal reconstructions using the alternate tree.

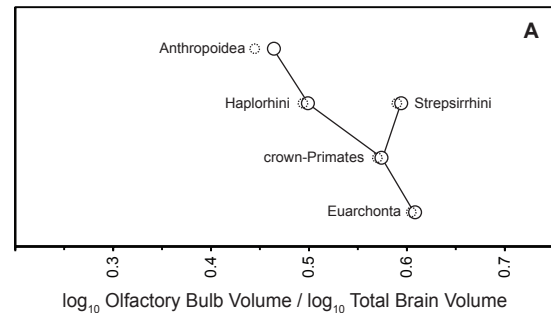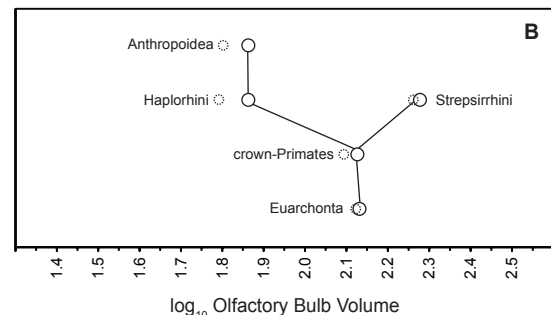

Supplement: pone.0113904.s001.pdf [file pone.0113904.s001.pdf]
